# Supplementary material
Source: publisher figshare collection journal article supplement (https://acs.figshare.com/ndownloader/files/7526356)
Supplement: Supplementary file 1 [file 7526356]

## **Supporting Information**

# **Photosensitizer Decorated Red Blood Cells as an Ultrasensitive Light-Responsive Drug Delivery System**

*Min Gao, Aiyan Hu, Xiaoqi Sun, Chao Wang, Ziliang Dong, Liangzhu Feng, Zhuang Liu\**

Institute of Functional Nano & Soft Materials (FUNSOM), the Jiangsu Key Laboratory for  
Carbon-Based Functional Materials & Devices, Soochow University, Suzhou 215123, P. R.  
China

Corresponding Author : E-mail: [zliu@suda.edu.cn](mailto:zliu@suda.edu.cn)

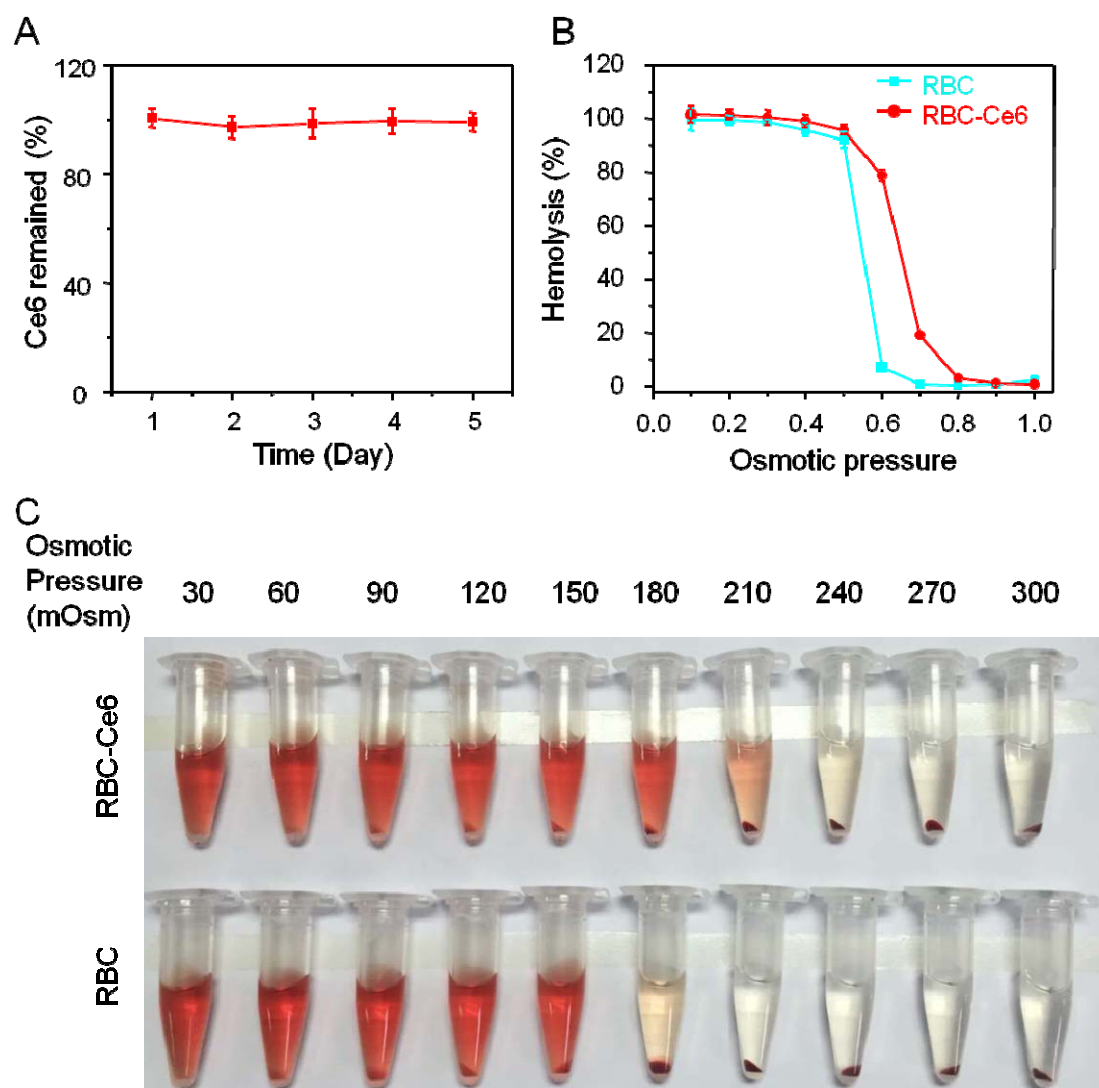

**Figure S1.** (A) Release of Ce6 from RBC-Ce6 over time in the dark. Error bars were based on standard deviation (SD) of triplicate samples. (B&C) Hemolytic test of RBC-Ce6 comparing with pure RBCs by incubating RBCs within PBS at different osmotic pressures.

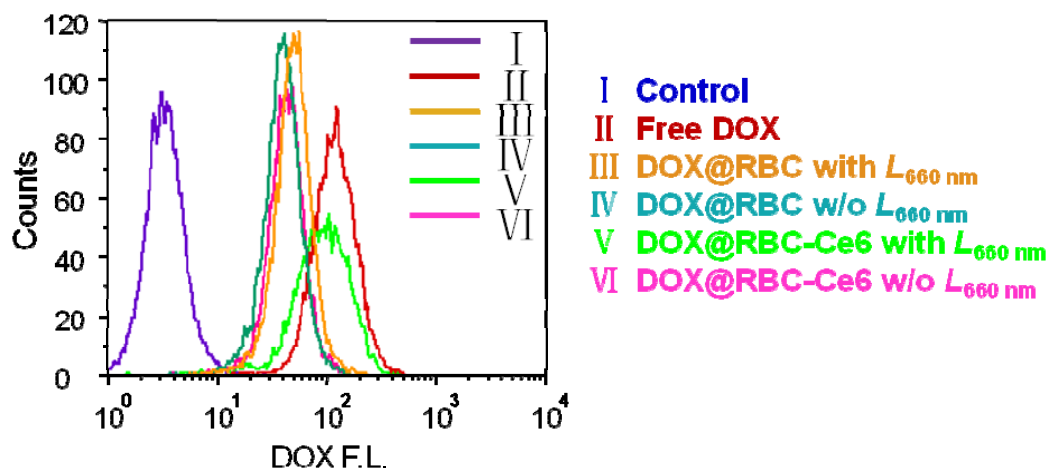

**Figure S2.** Flow cytometry data of cellular DOX fluorescence in 4T1 cells which were incubated with DOX@RBC-Ce6, DOX@RBC, RBC-Ce6, or free DOX for 30 min, followed by being exposed to 660-nm LED light irradiation ( $5\text{ mW/cm}^2$ , 10 min) or without light irradiation, and then further incubated for 6 h. Cells were treated with red blood cell lysis solution to remove RBCs before analysis.

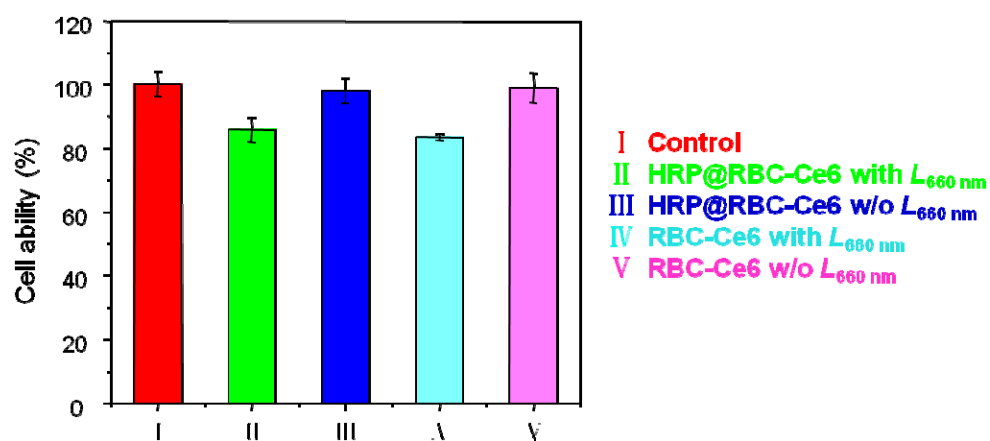

**Figure S3.** Relative viabilities of 4T1 cells incubated with HRP@RBC-Ce6 and RBC-Ce6, for 30 min, followed by being exposed to 660 nm LED light irradiation (or without light irradiation), then changed the culture medium and further incubated for 24 h. Error bars are based on at least quadruplicate measurement.
